# Supplementary material for: BN-PVDF/rGO-PVDF Laminate Nanocomposites for Energy Storage Applications
Source: MDPI journal article supplement (doi:10.3390/nano12244492), 2022-12-19
Supplement: s1 [file s1]

## Supporting Information

### **BN-PVDF/rGO-PVDF laminate Composites for Energy Storage Applications**

Okikiola Ganiu Agbabiaka<sup>1</sup>, Miracle Hope Adegun<sup>1</sup>, Kit-Ying Chan<sup>1,2</sup>, Heng Zhang<sup>1</sup>, Xi Shen<sup>1,2</sup>  
and Jang-Kyo Kim<sup>1,3\*</sup>

<sup>1</sup>Department of Mechanical and Aerospace Engineering, The Hong Kong University of Science and Technology, Clear Water Bay, Kowloon, Hong Kong

<sup>2</sup>Department of Aeronautical and Aviation Engineering, The Hong Kong Polytechnic University, Hung Hom, Kowloon, Hong Kong

<sup>3</sup>School of Mechanical and Manufacturing Engineering, The University of New South Wales, Sydney, NSW 2052, Australia

\*Corresponding email: mejkkim@ust.hk

**Table S1.** Designations of composite materials prepared in this work.

| Materials Designations                                     |           | Filler weight fraction (%) |     | No. of layers | Thickness ( $\mu\text{m}$ ) |
|------------------------------------------------------------|-----------|----------------------------|-----|---------------|-----------------------------|
|                                                            |           | BNNS                       | rGO |               |                             |
| BNNS/PVDF films                                            | BN10      | 10                         | -   | -             | 90                          |
|                                                            | BN20      | 20                         | -   | -             | 90                          |
|                                                            | BN30      | 30                         | -   | -             | 90                          |
| rGO/PVDF films                                             | rGO1      | -                          | 1   | -             | 90                          |
|                                                            | rGO3      | -                          | 3   | -             | 90                          |
|                                                            | rGO5      | -                          | 5   | -             | 90                          |
|                                                            | rGO10     | -                          | 10  | -             | 90                          |
| Bilayer composites<br>(G = 10 wt% rGO/PVDF; B = BNNS/PVDF) | G/B10     | 5                          | 5   | -             | 180                         |
|                                                            | G/B20     | 10                         | 5   | -             | 180                         |
|                                                            | G/B30     | 15                         | 5   | -             | 180                         |
| Microlaminate composites                                   | G/B30_4L  | 15                         | 5   | 4             | 240                         |
|                                                            | G/B30_8L  | 15                         | 5   | 8             | 300                         |
|                                                            | G/B30_16L | 15                         | 5   | 16            | 330                         |
|                                                            | G/B30_32L | 15                         | 5   | 32            | 300                         |

The densities of BNNS ( $\rho_{BNNS}$ ) and rGO ( $\rho_{rGO}$ ) are  $2.1 \text{ g/cm}^3$  and  $1.91 \text{ g/cm}^3$ , respectively.

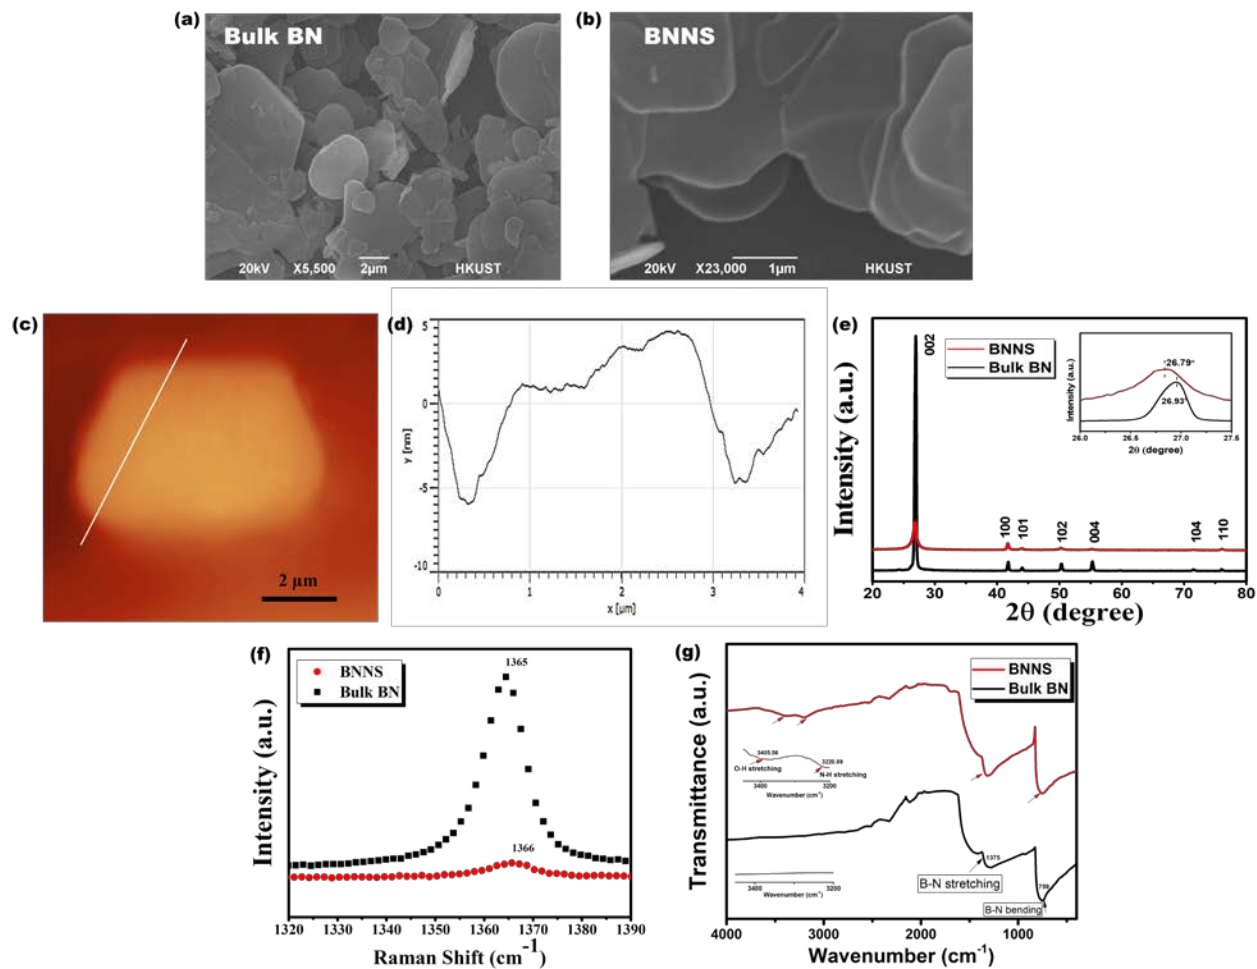

**Figure S1.** Morphology, structure and chemistry of bulk BN and BNNSs. (a-b) SEM images, (c-d) AFM image and the corresponding height profile of BNNS. (e) XRD patterns, (f) Raman spectra and (g) FTIR spectra of Bulk BN and BNNS.

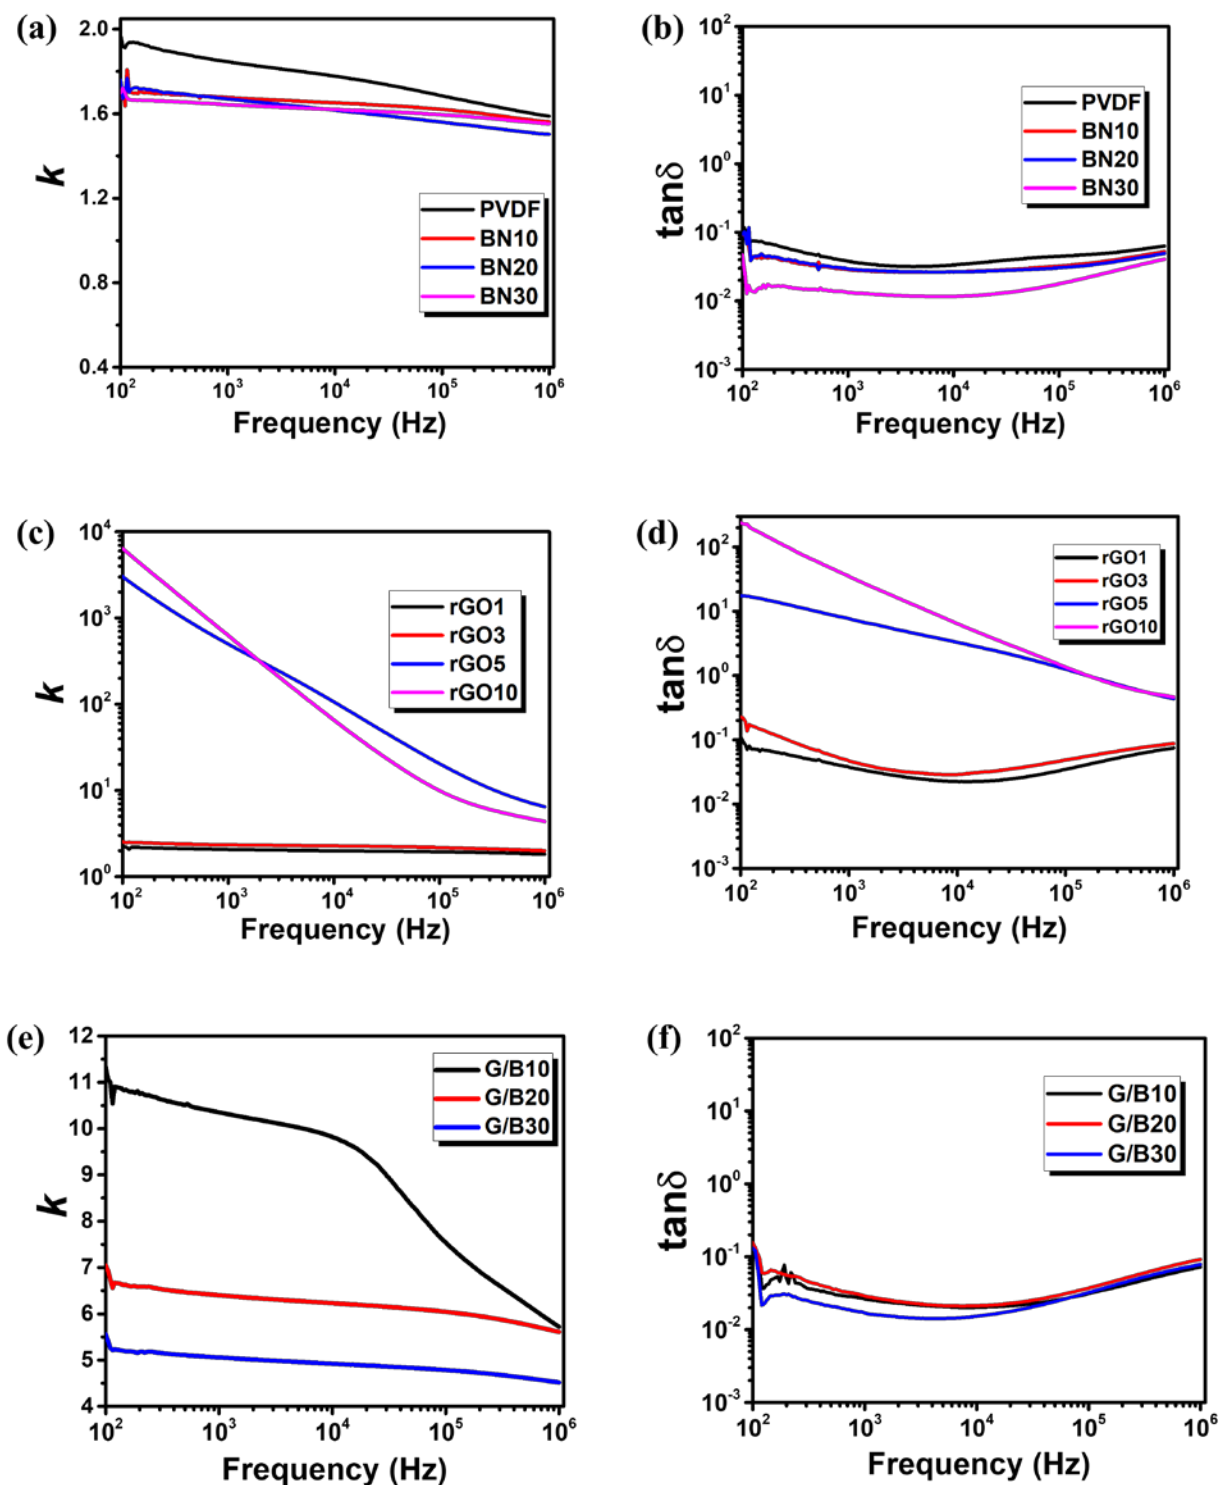

Figure S2. (a, c, e) Dielectric constant ( $k$ ) and (b, d, f) dielectric loss ( $\tan \delta$ ) of neat PVDF, BNNS/PVDF and rGO/PVDF single-layer composite films and G/B bilayer composites as a function of frequency ranging  $10^2$ - $10^6$  Hz.

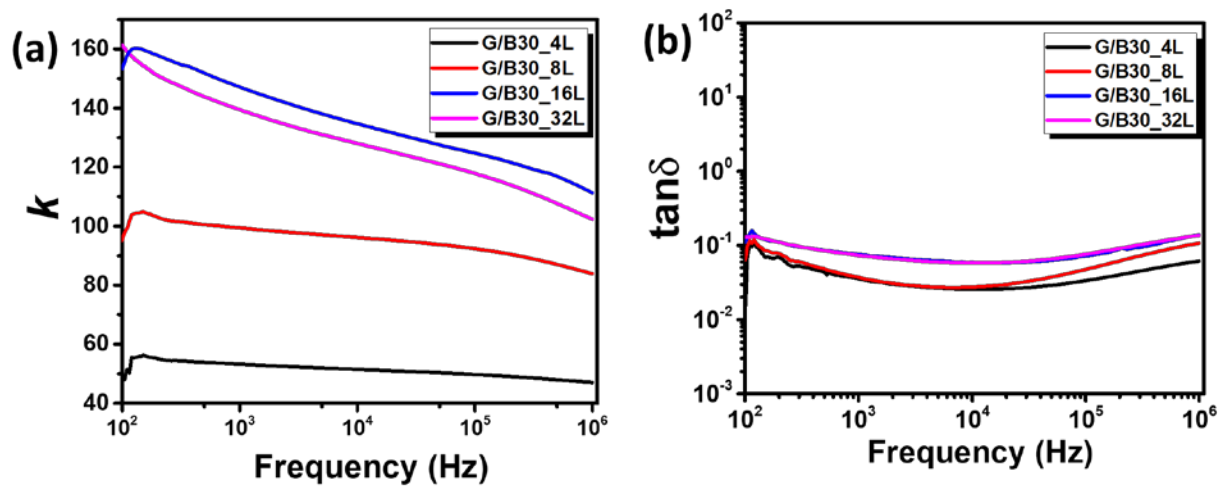

Figure S3. (a) Dielectric constant ( $k$ ) and (b) dielectric loss ( $\tan \delta$ ) of microlaminate composites with different number of layers as a function of frequency ranging  $10^2$ - $10^6$  Hz.

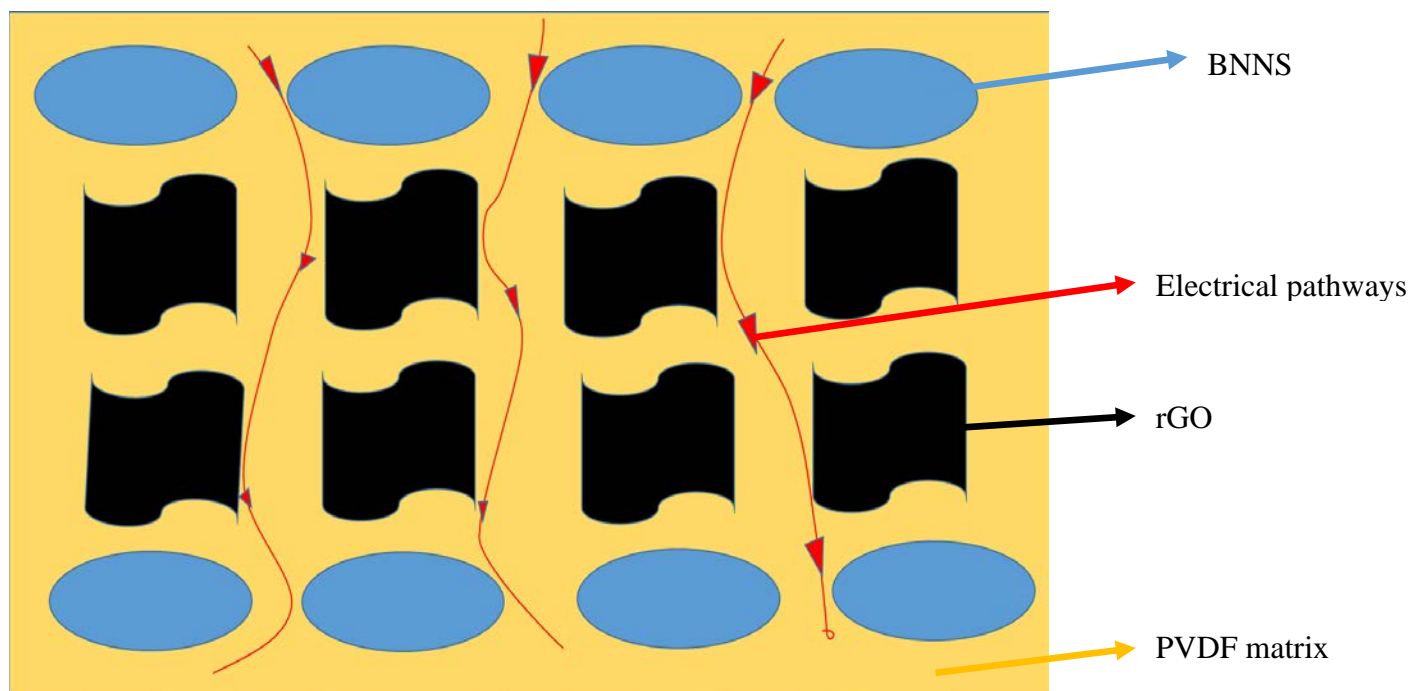

Figure S4. Schematic of electrical pathways in composites.
